# Supplementary material for: Gold nanoparticle photosensitized radical photopolymerization
Source: Royal Society of Chemistry journal article supplement (doi:10.1039/b812328d), 2008-10-31
Supplement: b812328d.pdf [file b812328d.pdf]

# Supporting Information

## Gold Nanoparticle Photosensitized Radical Photopolymerization.

*Kelechi C. Anyaogu, Xichen Cai, Douglas C. Neckers\**

Center for Photochemical Sciences, Bowling Green State University,  
Bowling Green, OH, 43403.

---

\* To whom correspondence should be addressed. E-mail: [neckers@photo.bgsu.edu](mailto:neckers@photo.bgsu.edu). Tel.: 419-372-2034;  
Fax: 419-372-0366.

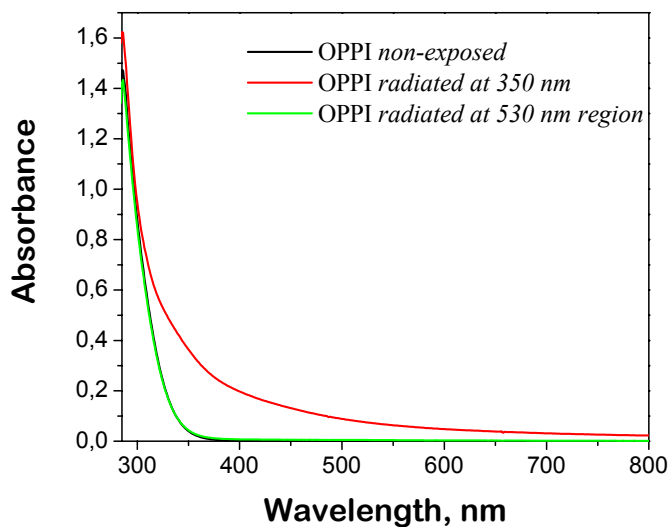

**Figure S1.** UV-Vis spectra (toluene) of [4-[(octyloxy)phenyl] phenyl] iodonium hexafluoroantimonate (OPPI) before (black line) and after irradiation (green and red lines) with Xenon lamp (LP filter  $\lambda > 450\text{nm}$ ).

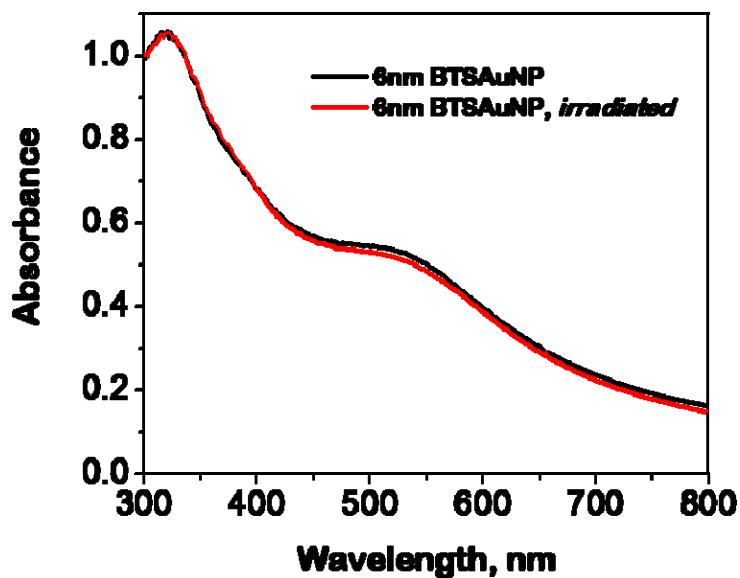

**Figure S2.** UV-Vis spectra (toluene) of 6nm BTSAuNPs before (black line) and after (red line) irradiation with Xe lamp (LP filter  $\lambda > 450\text{nm}$ ).

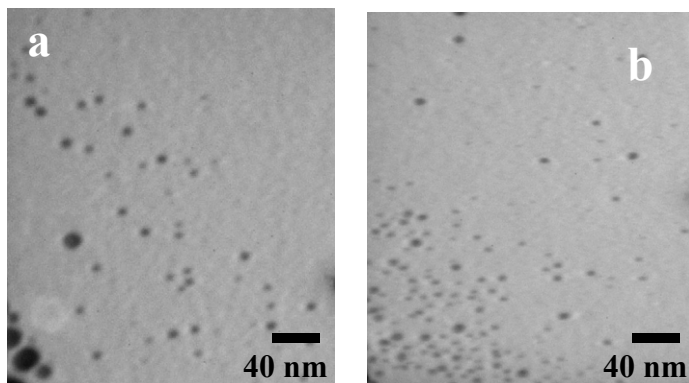

**Figure S3.** TEM images of 6nm DDTAuNPs (a) before and (b) after irradiation in the presence of OPPI using Xe lamp (LP filter  $\lambda > 450\text{nm}$ ).

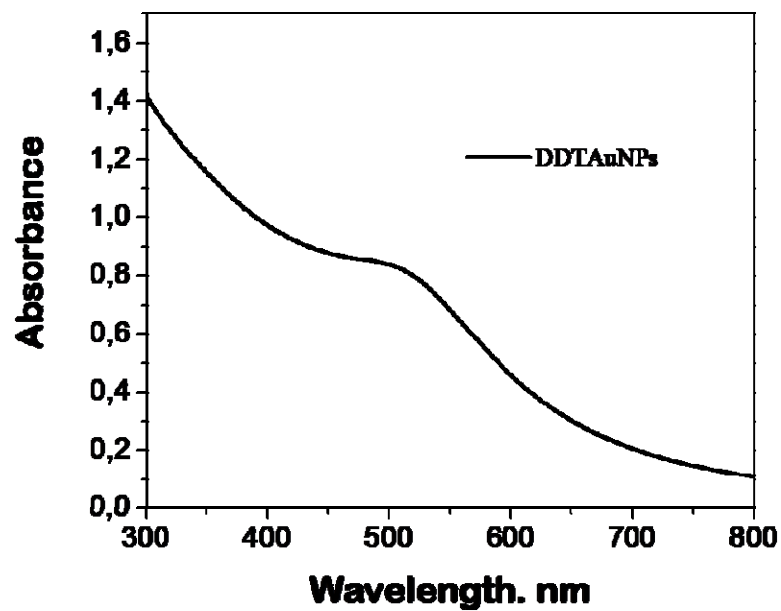

**Figure S4.** UV-Vis (toluene) of 6nm DDTAuNPs.

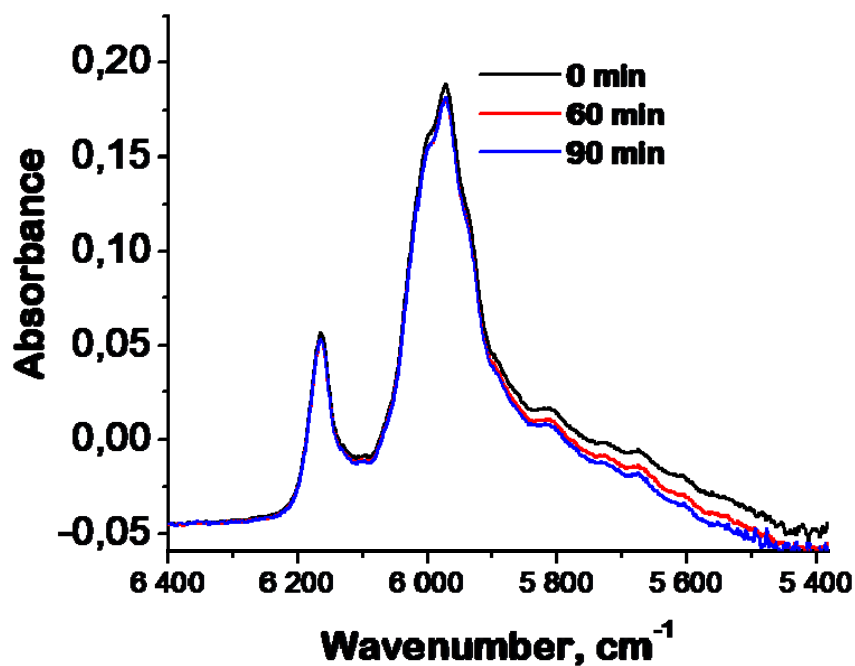

**Figure S5.** Near-IR spectra of BTSuNP/2-phenoxyethyl acrylate formulation at different exposure times to Xenon lamp (LP filter  $\lambda > 450\text{nm}$ ). No polymerization is evidenced.

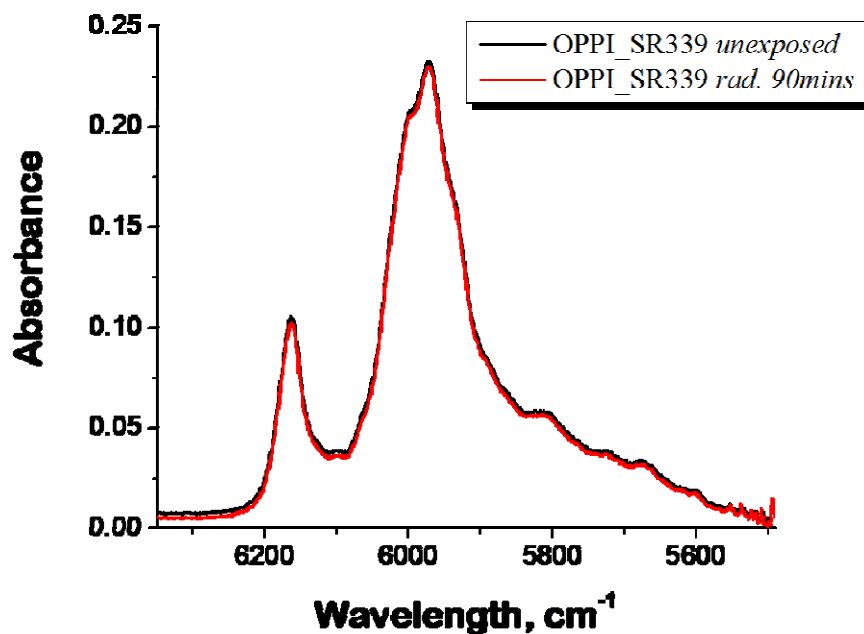

**Figure S6.** Near-IR spectra of OPPI/2-phenoxyethyl acrylate formulation before (black line) and after (red line) exposure to Xenon lamp (LP filter  $\lambda > 450\text{nm}$ ).

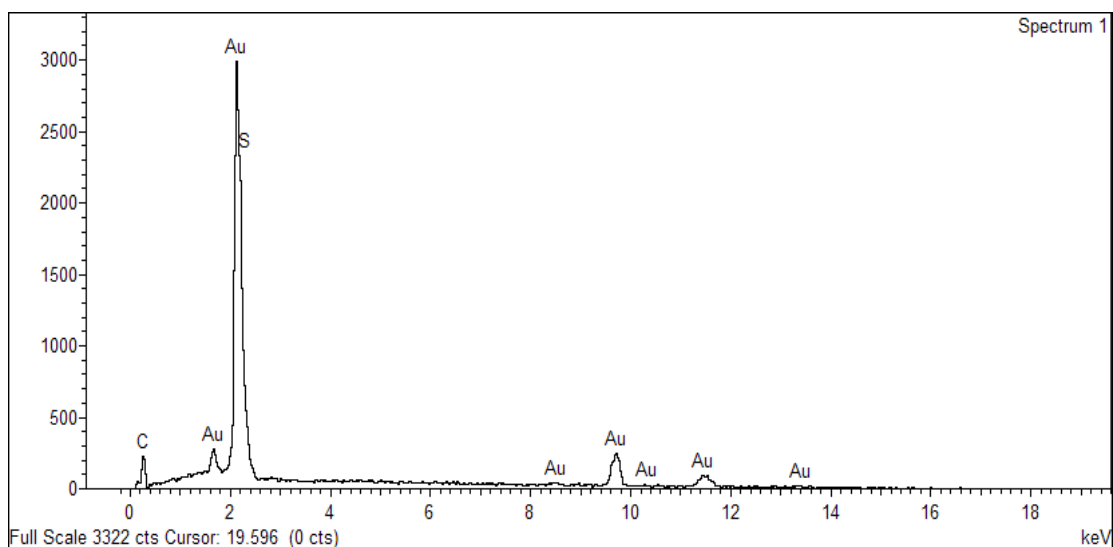

**Figure S7.** Energy dispersive X-ray (EDX) spectrum of BTSAuNPs. The particles are stable towards oxidation.

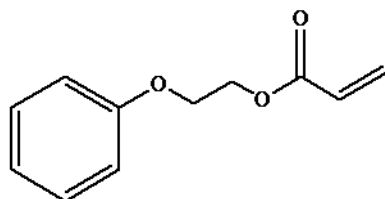

2-Phenoxyethyl acrylate (SR 339)

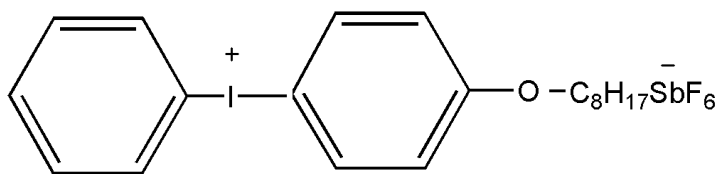

[4-[(Octyloxy)phenyl] phenyl] iodonium hexafluoroantimonate (OPPI)

**Figure S8.** Chemical structures of monomer and coinitorator.

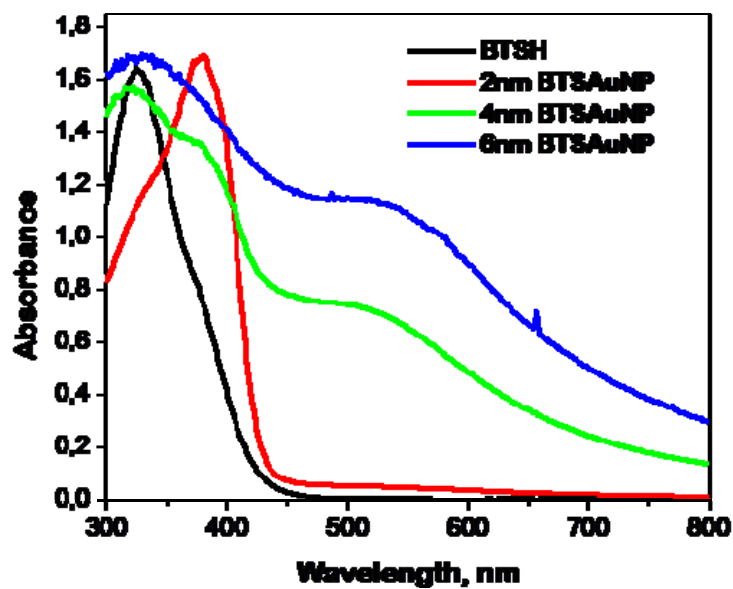

**Figure S9.** UV-Vis spectra of 5-mercapto-2,2'-bithiophene (black line), 2nm BTSAuNPs (red), 4nm BTSAuNPs (green), and 6nm BTSAuNPs (blue) in toluene.

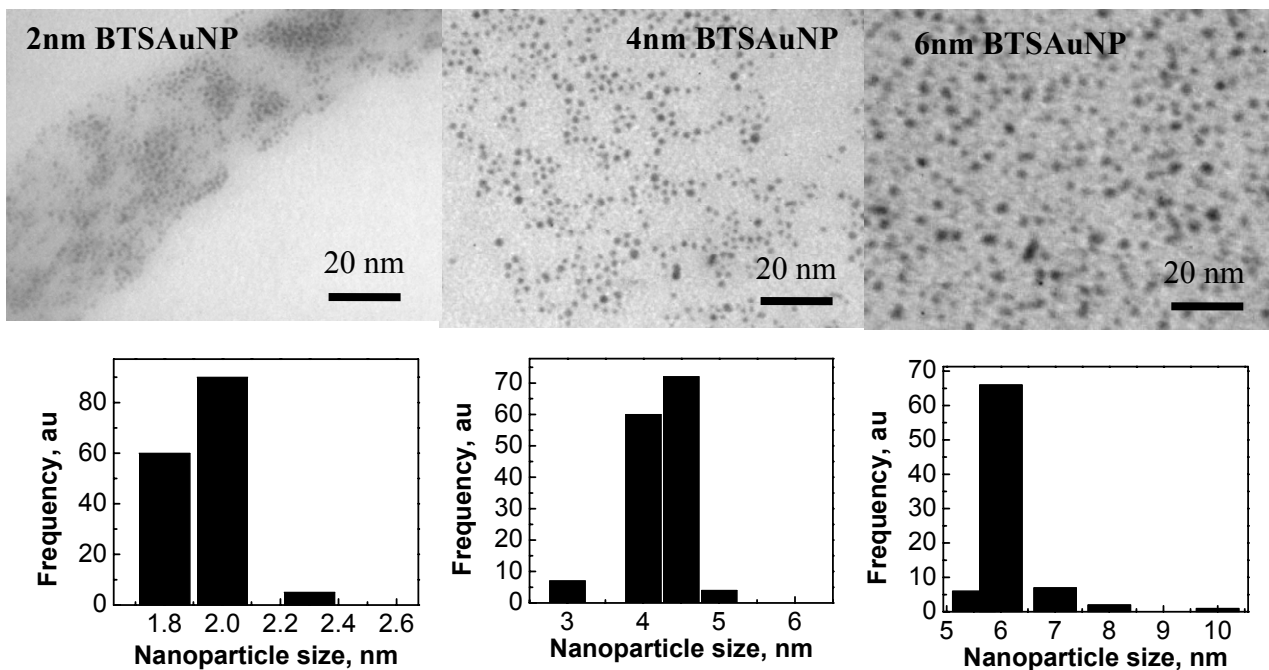

**Figure S10.** TEM images of the bithiophene functionalized AuNPs and the particle size distribution histograms ( $\sigma \sim 7-10$ ).
